Australia. We compared self-report of infection by women with the use of linked testing and medication administrative data to identify chlamydia infection.

**Methods:** We used data from 8474 women aged 22-27 years from the Australian Longitudinal Study on Women's Health in 2017. We compared self-report of a chlamydia infection in the previous 12 months with chlamydia infection estimated by having a prescription filled for azithromycin (the most commonly recommended treatment for chlamydia) within 28 days of having a chlamydia test through data linkage with the Medicare and Pharmaceutical Benefits database over the same 12-month period.

**Results:** Chlamydia infection was identified by self-report by 238 women. In contrast, 151 women had a prescription filled for azithromycin within 28 days of having a chlamydia test. Of the 151 women identified with chlamydia infection through data linkage, 101 also self-reported chlamydia infection (positive percent agreement = 67%). Of the 8323 women who did not have a chlamydia infection identified through data linkage, 8186 women also did not self-report a chlamydia infection (negative percent agreement = 98%).

**Conclusions:** Our study is consistent with previous studies indicating only moderate agreement between self-report of chlamydia infection and infection identified through data linkage. Further triangulation with medical records is needed to ascertain which of the two methods is more accurate.

**Key messages:** It remains unclear whether linked administrative data is preferable to self-report in estimating chlamydia infection in population studies.

#### Abstract #: 1252

### Agreement between self-reported chlamydia infection and chlamydia infection ascertained using testing and medication administrative data

Louise Wilson<sup>1</sup>, Annette Dobson<sup>1</sup>, Jenny Doust<sup>1</sup>, Gita Mishra<sup>1</sup>

<sup>1</sup>The University Of Queensland, Herston, Australia

**Background:** Chlamydia trachomatis is the most frequently notified sexually transmitted infection (STI) in several countries, including
